# Supplementary material
Source: PubMed Central journal article supplement (PMC4150395)
Supplement: Supp_Fig3.pdf [file Supp_Fig3.pdf]

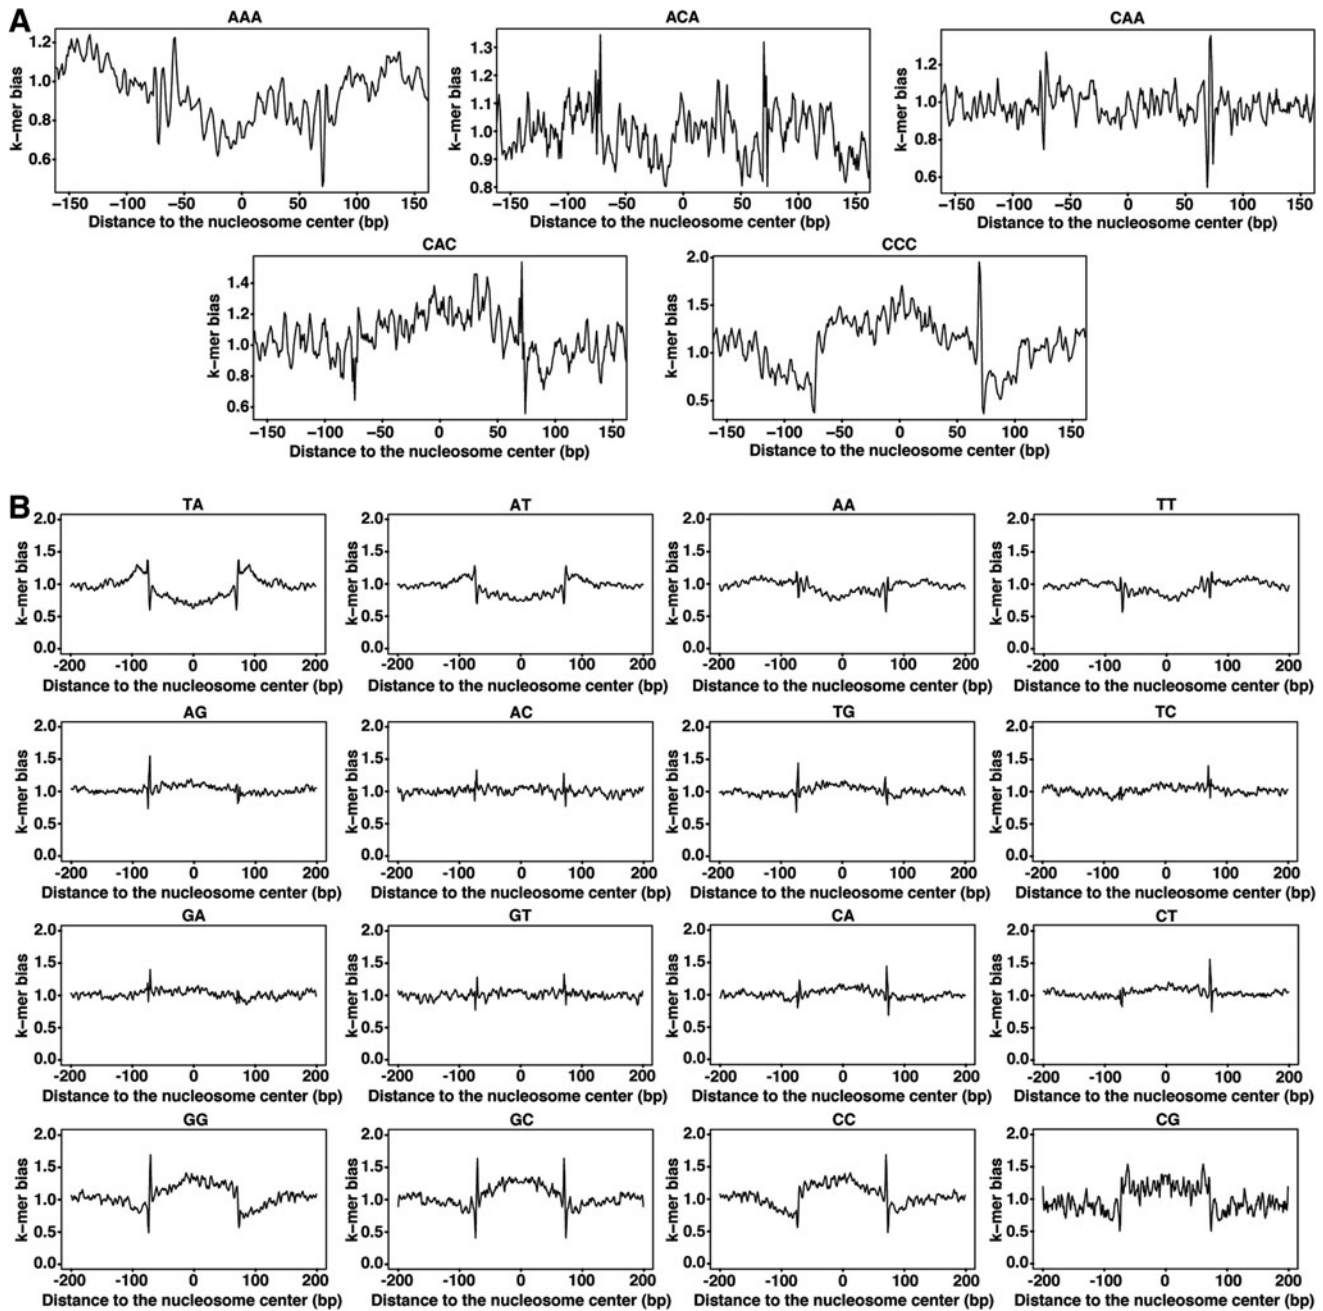

**SUPPLEMENTARY FIG. S3.** Specific dimers and trimers' contribution to nucleosome occupancy (related to Fig. 4). (A) Data were generated and represented as in Fig. 4A. Shown are signatures of rotational positioning of *in vivo* nucleosomes. Shown in individual plots is a subset of the oligomers composed of C's and A's. (B) Data were generated and represented as in Fig. 4B. Shown in individual plots are position-dependent sequence preferences of well-positioned nucleosomes in the collection of all the *in vivo* maps.
