# Supplementary material
Source: PubMed Central journal article supplement (PMC4150395)
Supplement: Supp_Table1.pdf [file Supp_Table1.pdf]

SUPPLEMENTARY TABLE S1. LIST OF PRIMERS

| <i>Gene</i>     | <i>Forward primer (5' → 3')</i> | <i>Reverse primer (5' → 3')</i> |
|-----------------|---------------------------------|---------------------------------|
| <i>IFNA1/13</i> | GCAAGCCCAGAAGTATCTGC            | ACTGGTTGCCATCAAACCTCC           |
| <i>IFNA2</i>    | CATTGATTCGTATGCCAGCTCACCT       | CAGTCAGCATGGTCCTCTGTAAGG        |
| <i>IFNA5</i>    | TGCATGGGAGGTTGTCAGAGCA          | AACGGCAGAACTCAAGAAGTGTGAA       |
| <i>IFNA6</i>    | CTGGACTGTGATCTGCCTCA            | CTCAGCCTTCTGGAACCTGG            |
| <i>IFNA8</i>    | ACCAGCTCAGCAGCATCCACA           | AGGCCCTCCTGTTACCCAGGC           |
| <i>IFNA10</i>   | ATGGCCGTGCTGGTGCTCAG            | ACTCCTCCTGGGGGATTTCGGA          |
| <i>IFNA14</i>   | CCAGCCCAGCAGCATCTTCGG           | GAGCACCACCAGGGCCATCAT           |
| <i>IFNA21</i>   | AGCCCTTGTGCCTGGGAGGT            | GCAGAAGTCATAGAAGTGTGGACTGGT     |
| <i>IFNW1</i>    | CCCAATGGCCCTCCTGTTCCC           | GGCCTTCTGCAACTGGCTCCC           |
| <i>IFNB1</i>    | CATTACCTGAAGGCCAAGGA            | CAATTGTCCAGTCCCAGAGG            |
| <i>GAPDH</i>    | ACAGTCAGCCGCATCTTCTT            | ACGACCAAATCCGTTGACTC            |
